# Supplementary material for: Phase-dependent polymerization isomerism in the coordination complexes of a flexible bis(β-diketonato) ligand
Source: Royal Society of Chemistry journal article supplement (doi:10.1039/d4dt02574a), 2024-01-01
Supplement: d4dt02574a2.pdf [file d4dt02574a2.pdf]

**Electronic energy and standard Gibbs free energy for the conformers of each compound optimized at the B97-3c level of theory**  
 and lying within 1 kcal/mol from the ground conformer (highlighted in orange). The electronic energy and standard Gibbs free energy of the ground  
 conformers optimized at the TPSSh level of theory are also quoted for comparison.

|                        | <b>B97-3c</b>          |                |                       | <b>TPSSh</b>           |                |
|------------------------|------------------------|----------------|-----------------------|------------------------|----------------|
|                        | Electronic energy (Eh) | G° (Eh)        | G° - G°min (kcal/mol) | Electronic energy (Eh) | G° (Eh)        |
| <b>CoL.001</b>         | -2381.67939347883      | -2381.38895907 | 0.00                  | -2382.30506027118      | -2382.01271513 |
| <b>CoLpy.001</b>       | -2629.86557773221      | -2629.49310691 | 0.37                  |                        |                |
| <b>CoLpy.010</b>       | -2629.86648148943      | -2629.49369973 | 0.00                  | -2630.73774160234      | -2630.36221829 |
| <b>CoLpy.012</b>       | -2629.86628976642      | -2629.49352229 | 0.11                  |                        |                |
| <b>CoLpy2cis.002</b>   | -2878.05252005451      | -2877.59758530 | 0.16                  |                        |                |
| <b>CoLpy2cis.003</b>   | -2878.05287162491      | -2877.59784742 | 0.00                  | -2879.17252245147      | -2878.71295488 |
| <b>CoLpy2cis.004</b>   | -2878.05124989715      | -2877.59679029 | 0.66                  |                        |                |
| <b>CoLpy2cis.007</b>   | -2878.05318057563      | -2877.59764715 | 0.13                  |                        |                |
| <b>CoLpy2trans.001</b> | -2878.05262317449      | -2877.59700358 | 0.42                  |                        |                |
| <b>CoLpy2trans.004</b> | -2878.05343220078      | -2877.59766855 | 0.00                  | -2879.17234504063      | -2878.71259957 |
| <b>py</b>              | -248.16619606987       | -248.10557102  | 0.00                  | -248.40962770746       | -248.34799261  |
